# Supplementary material
Source: publisher figshare collection journal article supplement (https://karger.figshare.com/ndownloader/files/28959549)
Supplement: Supplementary file 1 [file 28959549]

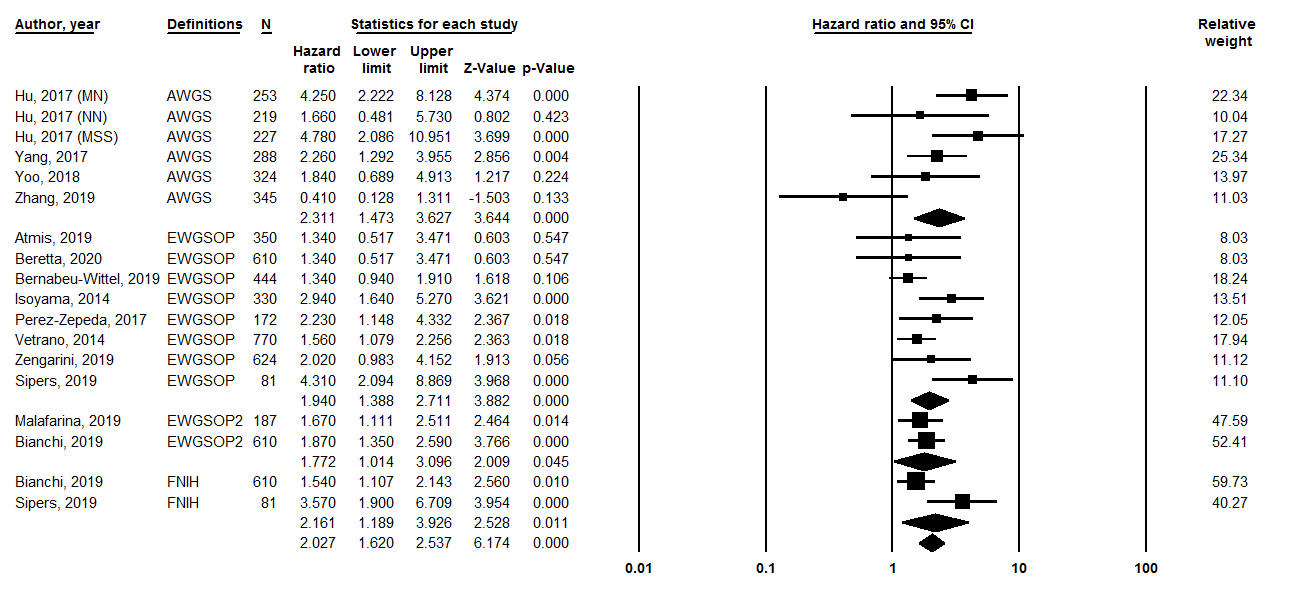
**Supplementary Figure 3.** Meta-analysis of the association between sarcopenia and mortality in inpatients presented in hazard ratios, stratified by definition

Heterogeneity (I2): AWGS (67.5%), EWGSOP (45.4%), EWGSOP2 (0%), FNIH (81.3%). AWGS: Asian Working Group for Sarcopenia, EWGSOP: European Working Group on Sarcopenia in Older People 2010, EWGSOP2: European Working Group on Sarcopenia in Older people 2018, FNIH: Foundation for the National Institutes of Health, MN: sarcopenia with a risk of malnutrition, NN: sarcopenia with normal nutrition, MSS: malnutrition-sarcopenia syndrome.
